# Supplementary material for: Polydopamine-assisted versatile modification of a nucleic acid probe for intracellular microRNA imaging and enhanced photothermal therapy
Source: PubMed Central journal article supplement (PMC9078363; doi:10.1039/c8ra00261d), 2018-02-12
Supplement: RA-008-C8RA00261D-s001.pdf [file RA-008-C8RA00261D-s001.pdf]

## Electronic Supplementary Information

### Polydopamine assisted versatile modification of nucleic acid probe for intracellular microRNA imaging and enhanced photothermal therapy

Aixian Zheng,<sup>ab</sup> Xiaolong Zhang,<sup>ab</sup> Yanbing Huang,<sup>ab</sup> Zhixiong Cai,<sup>ab</sup> Xiaolong Liu,<sup>ab</sup> and Jingfeng Liu<sup>\*abc</sup>

<sup>a</sup>The United Innovation of Mengchao Hepatobiliary Technology Key Laboratory of Fujian Province, Mengchao Hepatobiliary Hospital of Fujian Medical University, Fuzhou 350025, P. R. China.

<sup>b</sup>The Liver Center of Fujian Province, Fujian Medical University, Fuzhou 350025, P. R. China.

<sup>c</sup>Liver Disease Center, The First Affiliated Hospital of Fujian Medical University, Fuzhou 350005, P. R. China.

\*Corresponding author. Tel: +86-591-83705927; E-mail: drjingfeng@126.com

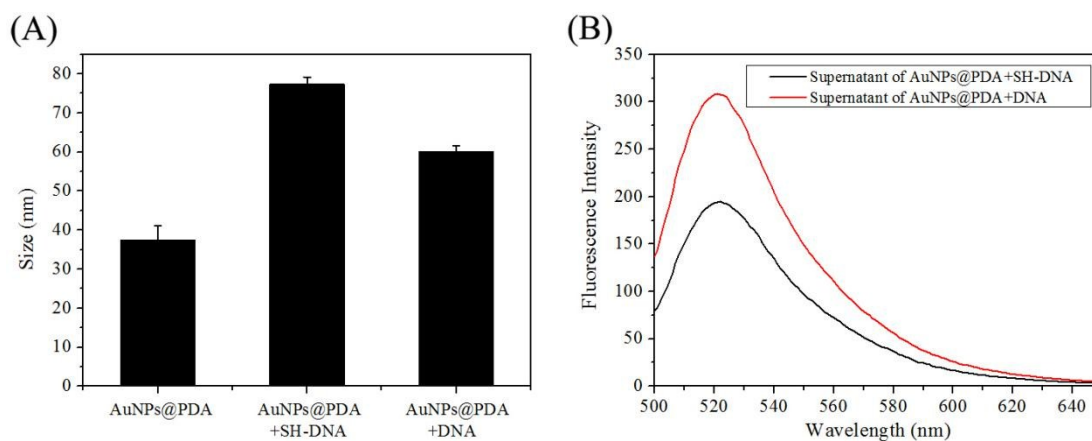

**Fig. S1** (A) Hydrodynamic size of AuNPs@PDA and the size after modification with thiol-terminated DNA or unlabeled DNA; (B) The Fluorescence-emission spectra of the diluted supernatant of AuNPs@PDA reacted with thiol-terminated DNA or unlabeled DNA.

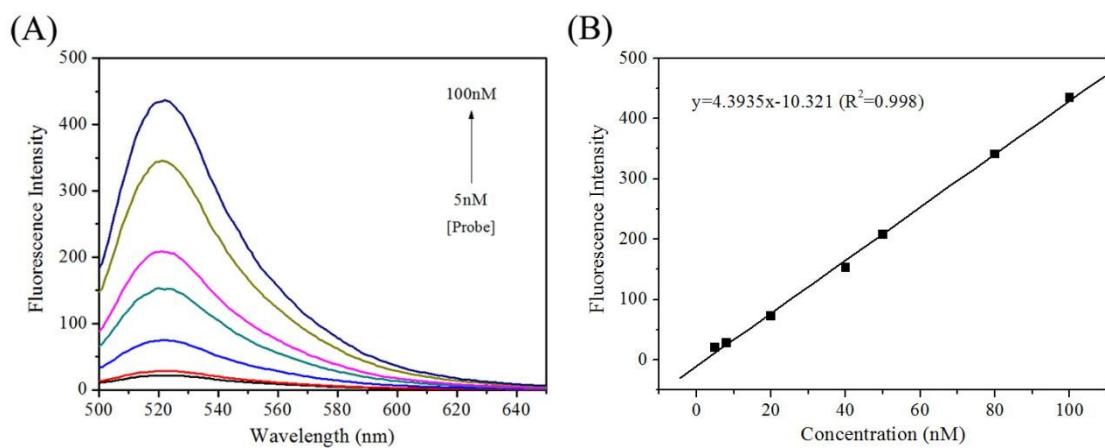

**Fig. S2** (A) The Fluorescence-emission spectra of different concentrations of FITC-labelled antisense probe in PBS; (B) the calibration curve for the quantitation of nucleic acid probe.

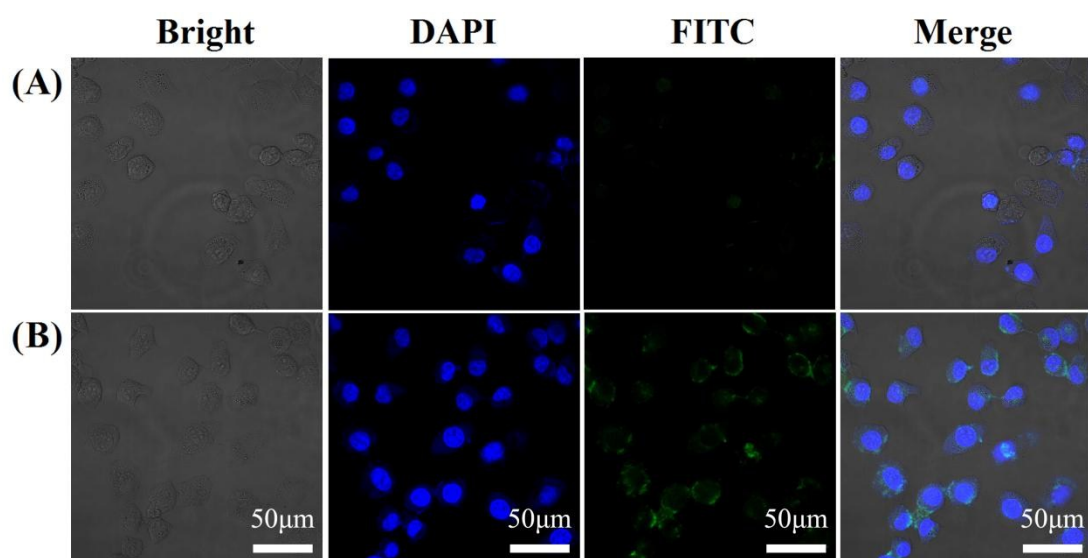

**Fig. S3** Confocal images of HepG2 cells with different treatment. (A) cells only; (B) cells incubated with AuNPs@PDA-dsDNA (1 nM) for 2 h. The cells were then fixed with 4 % paraformaldehyde and stained with DAPI before imaging.
